# Supplementary material for: Modelling Permafrost Distribution in Western Himalaya Using Remote Sensing and Field Observations
Source: MDPI journal article supplement (doi:10.3390/rs13214403), 2021-11-01
Supplement: s1 [file s1]

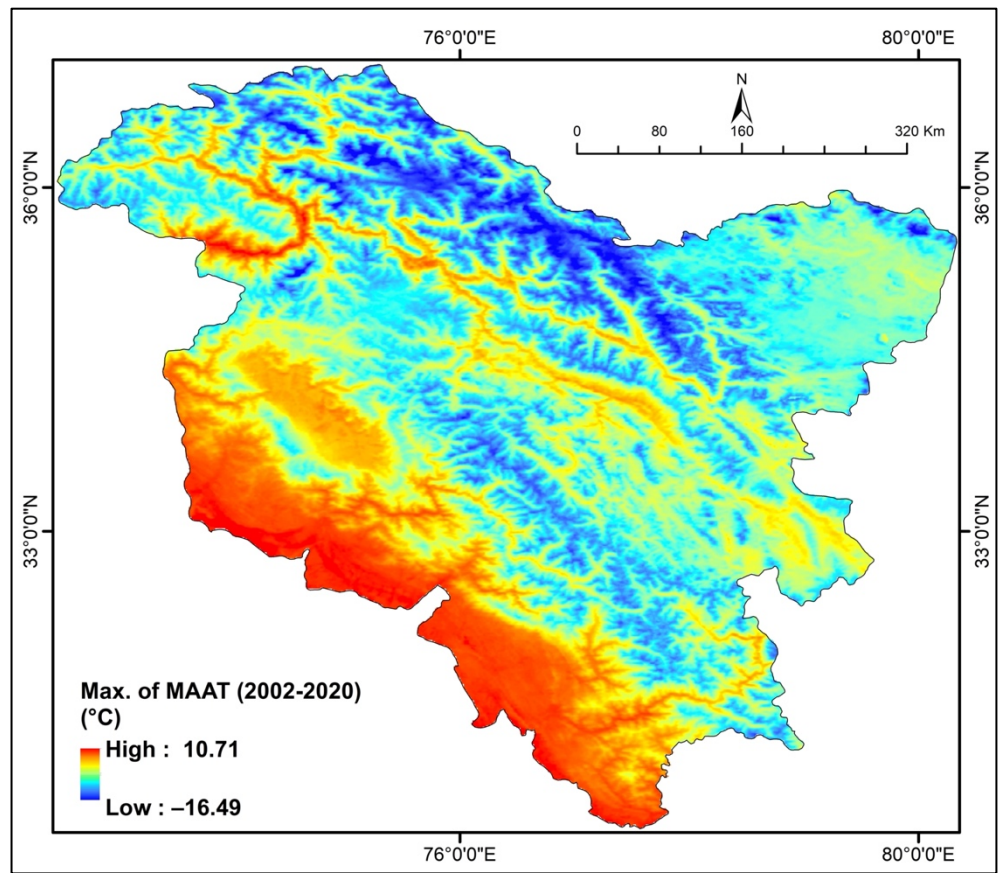

**Figure S1.** Maps of the study area showing the maximum of mean annual air temperature (MAAT) from 2002-04 to 2018-20 in °C.

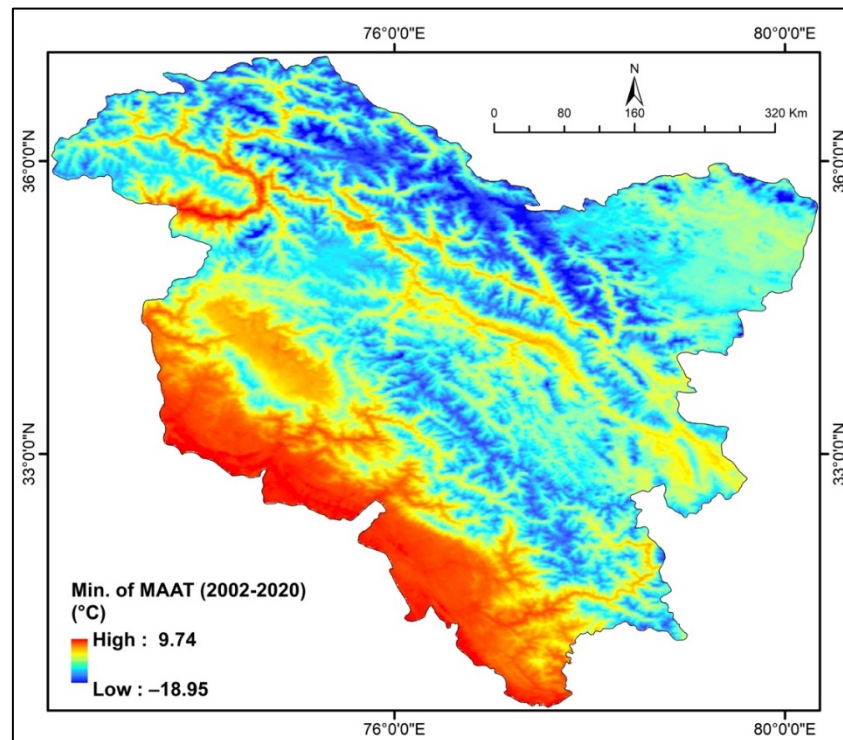

**Figure S2.** Map of the study area showing the minimum of mean annual air temperature (MAAT) from 2002-04 to 2018-20 in °C.

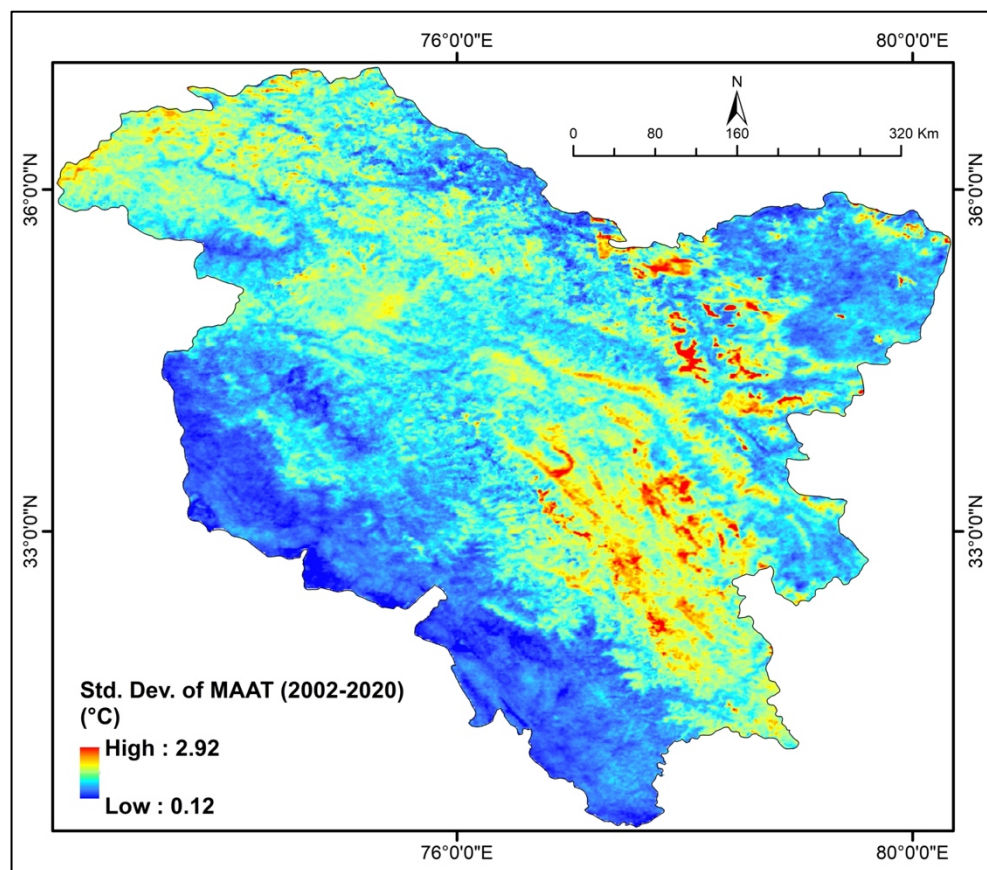

**Figure S3.** Map of the study area showing the standard deviation in mean annual air temperature (MAAT) from 2002-04 to 2018-20 in °C.

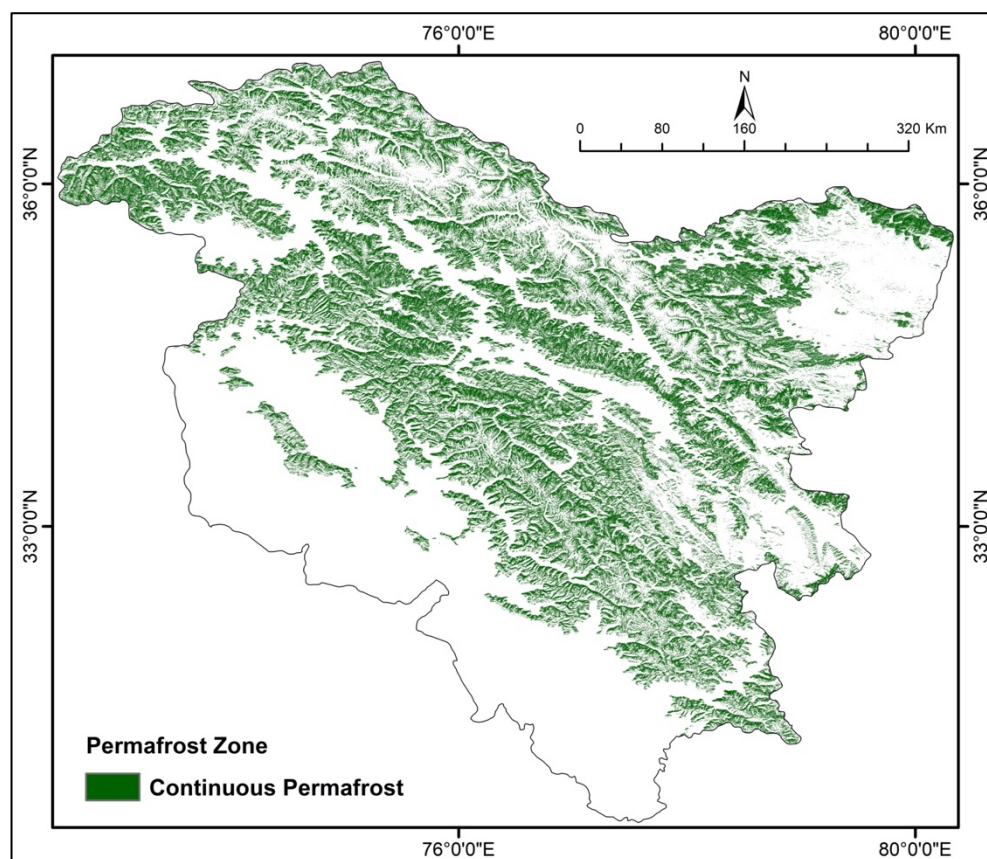

**Figure S4.** Map of the study area showing the distribution of continuous permafrost zone based on the maximum of BMAT from 2002-04 to 2018-20.



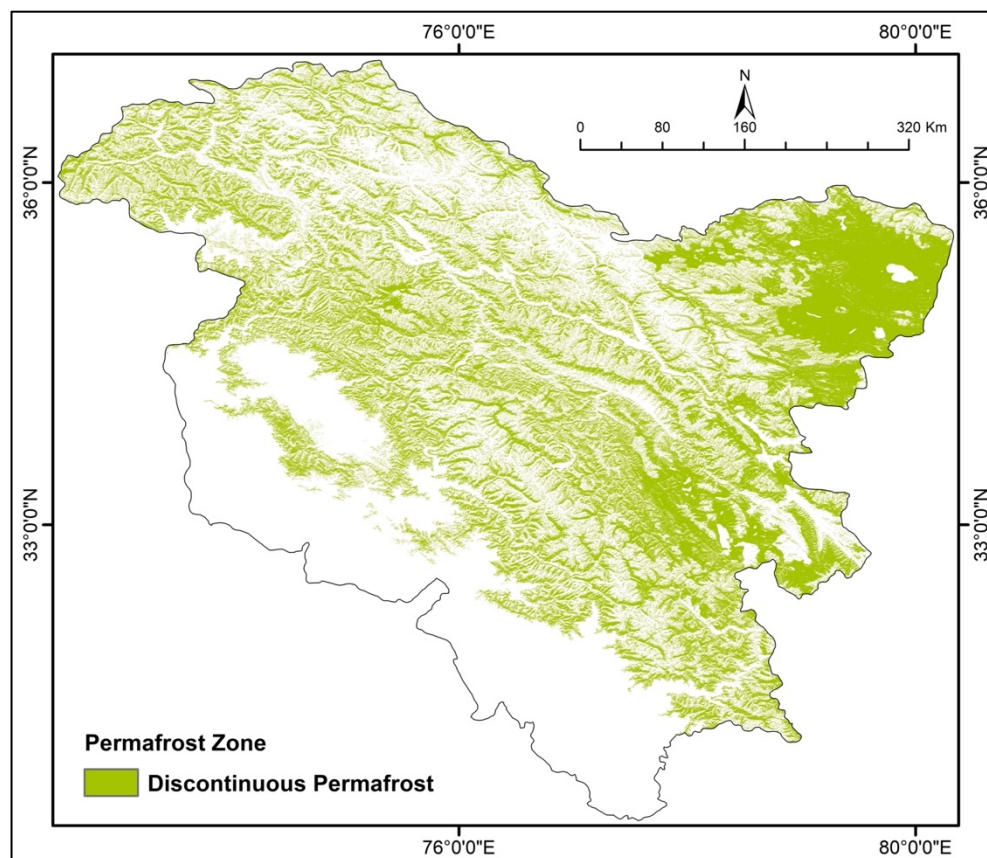

**Figure S5.** Map of the study area showing the distribution of discontinuous permafrost zone based on the maximum of BMAT from 2002-04 to 2018-20.

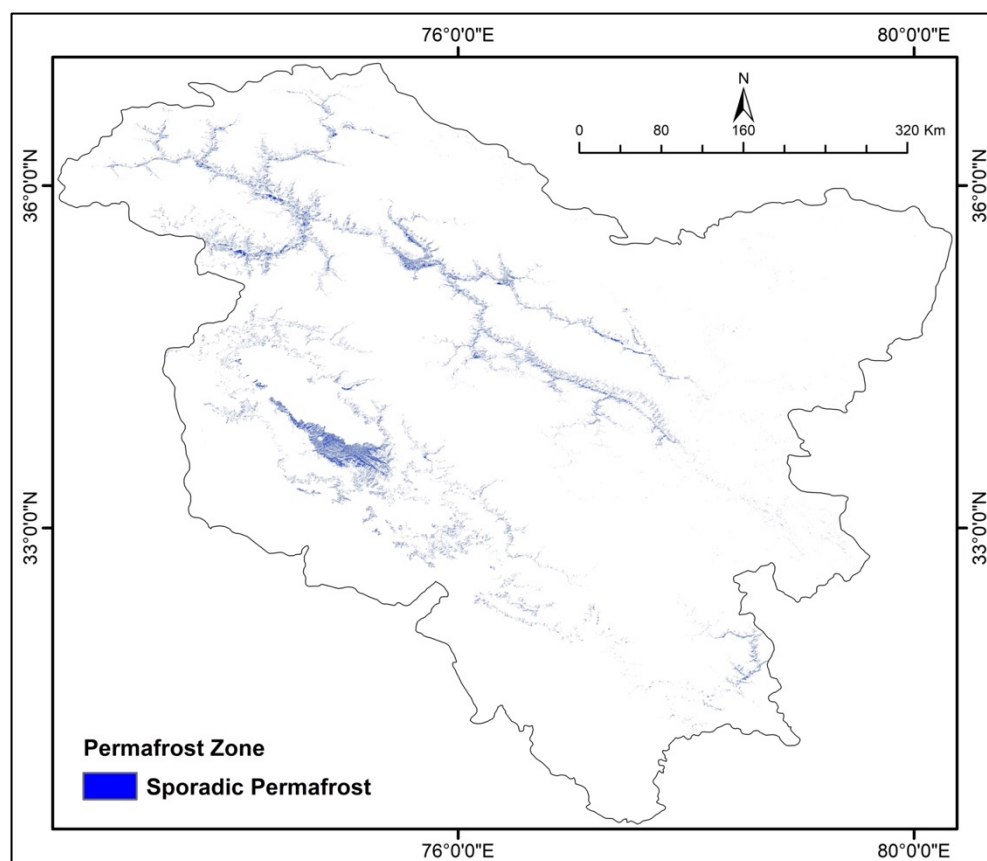

**Figure S6.** Map of the study area showing the distribution of sporadic permafrost zone based on the maximum of BMAT from 2002-04 to 2018-20.

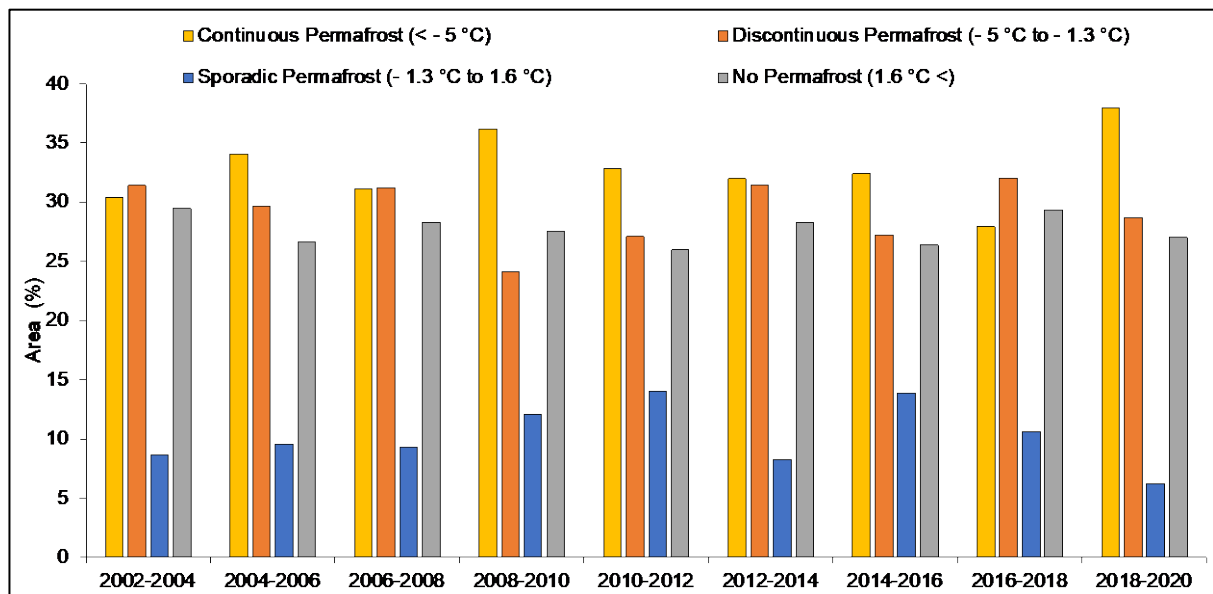

Figure S7. Bar chart showing the temporal extent of permafrost zones in the study area.

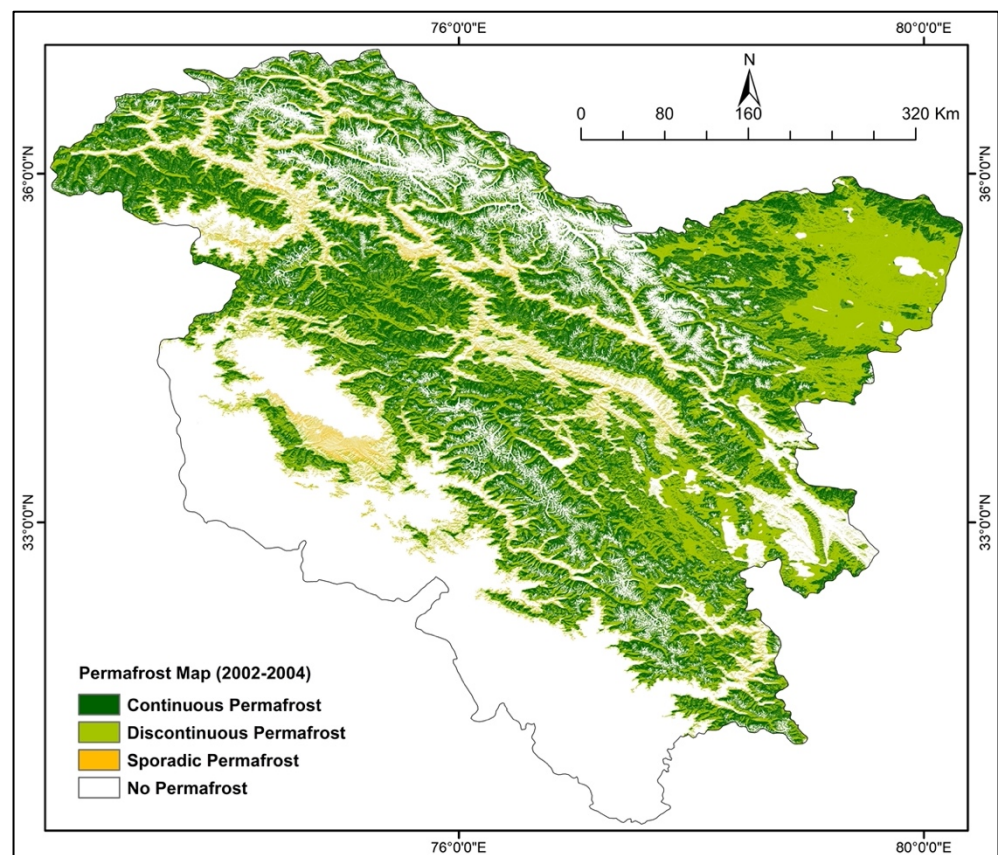

Figure S8. Map of the study area showing the permafrost extent for 2002-04.

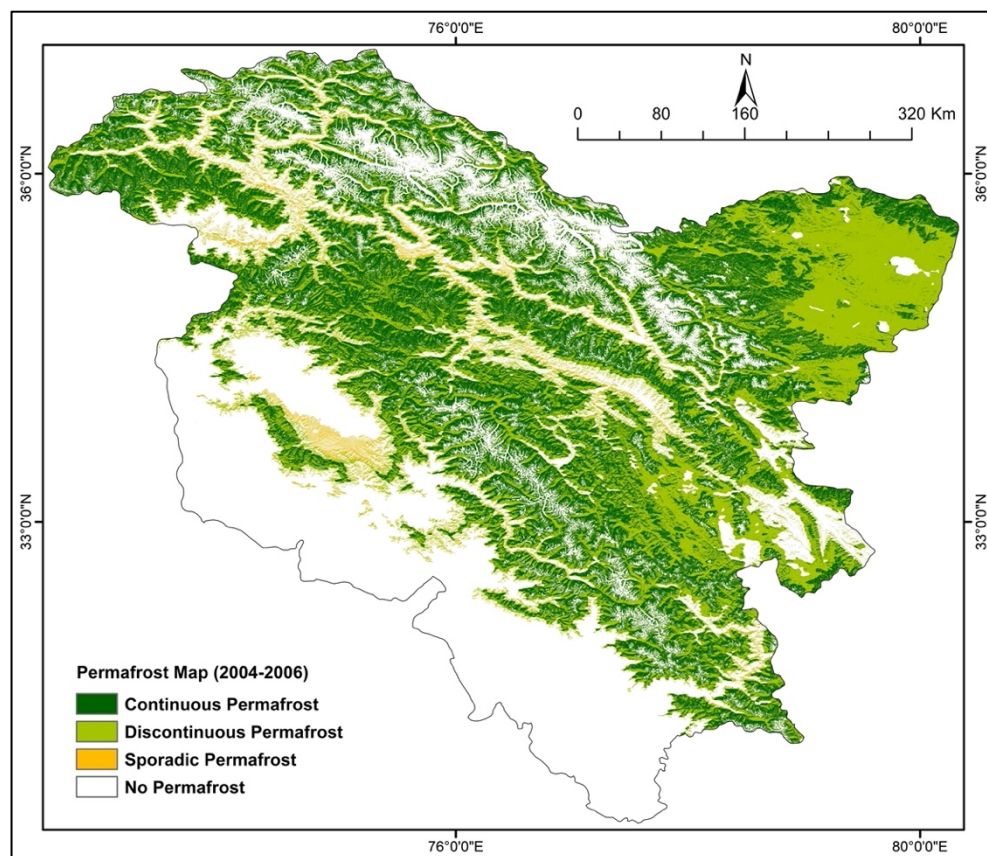

Figure S9. Map of the study area showing the permafrost extent for 2004-06.

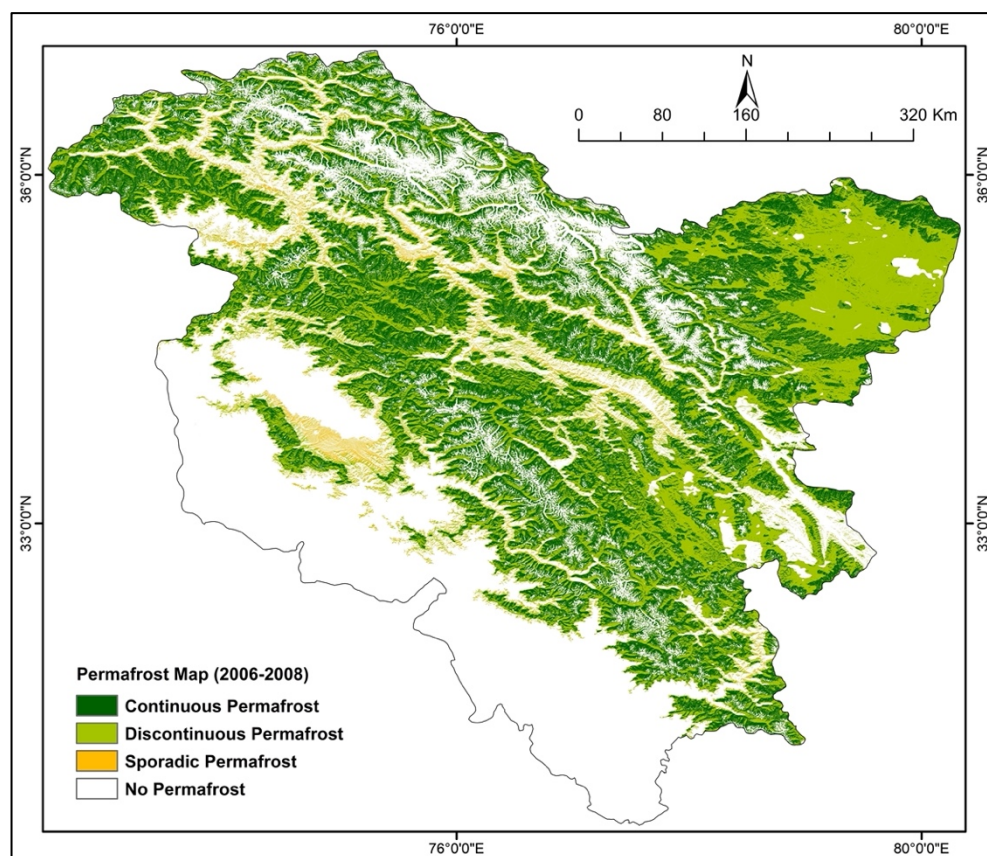

Figure S10. Map of the study area showing the permafrost extent for 2006-08.



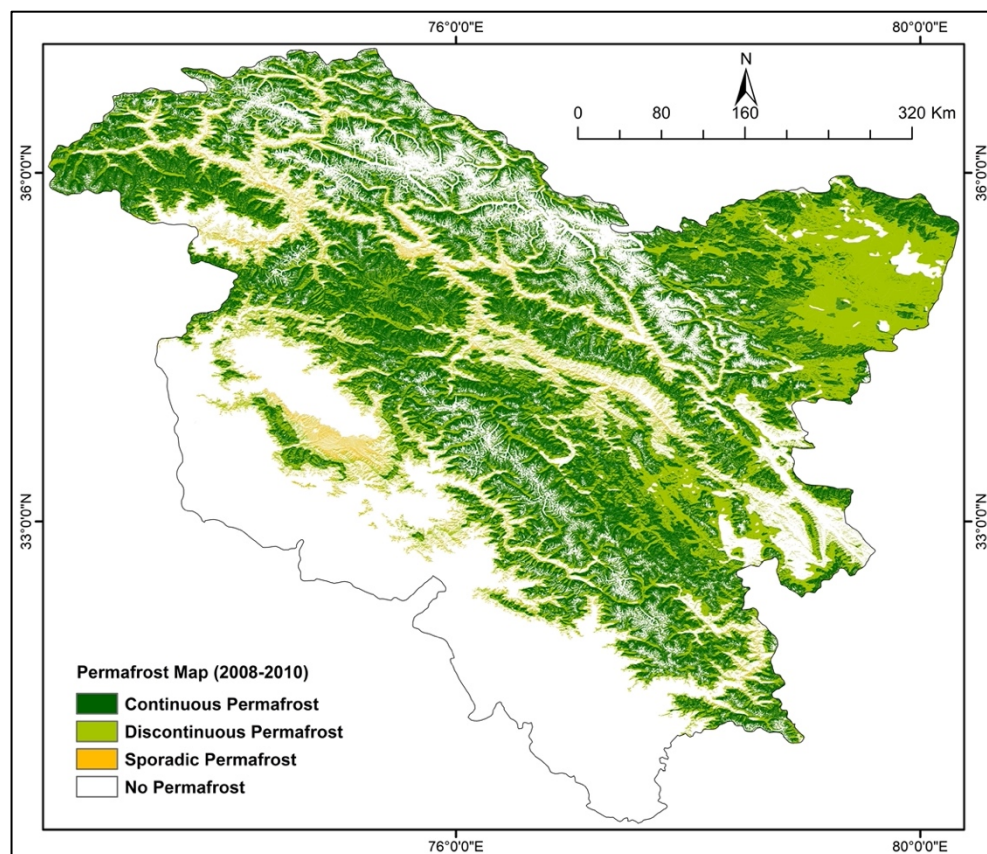

Figure S11. Map of the study area showing the permafrost extent for 2008-10.

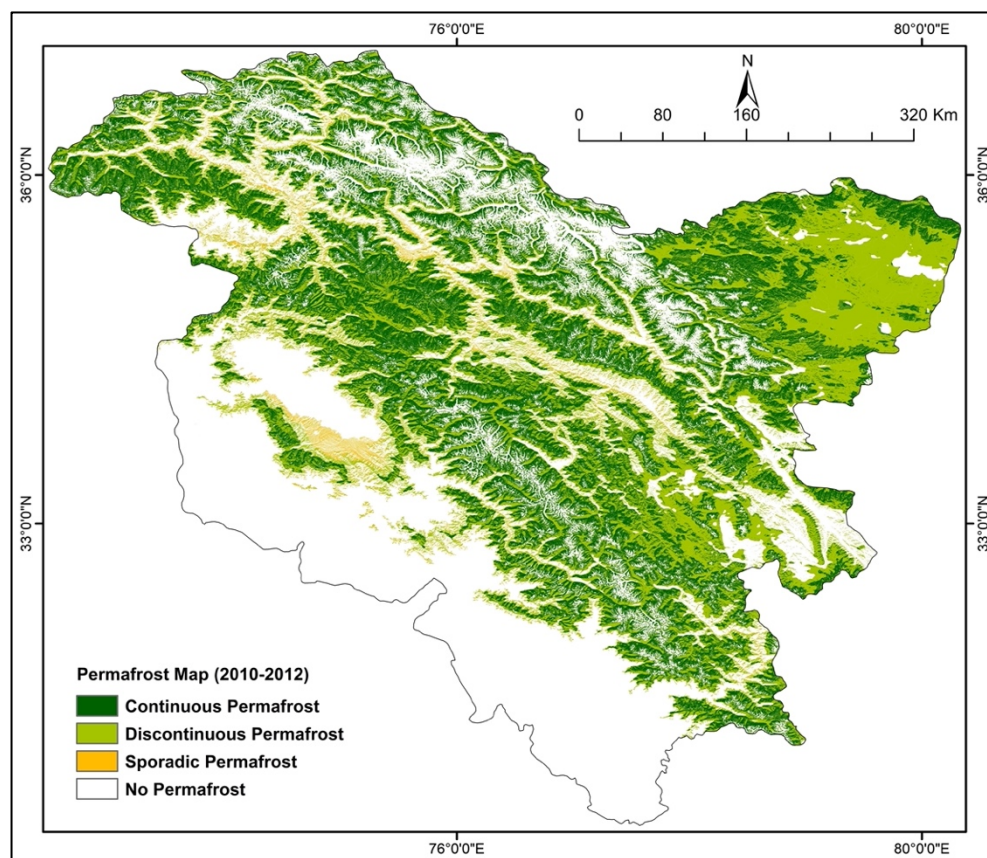

Figure S12. Map of the study area showing the permafrost extent for 2010-12.

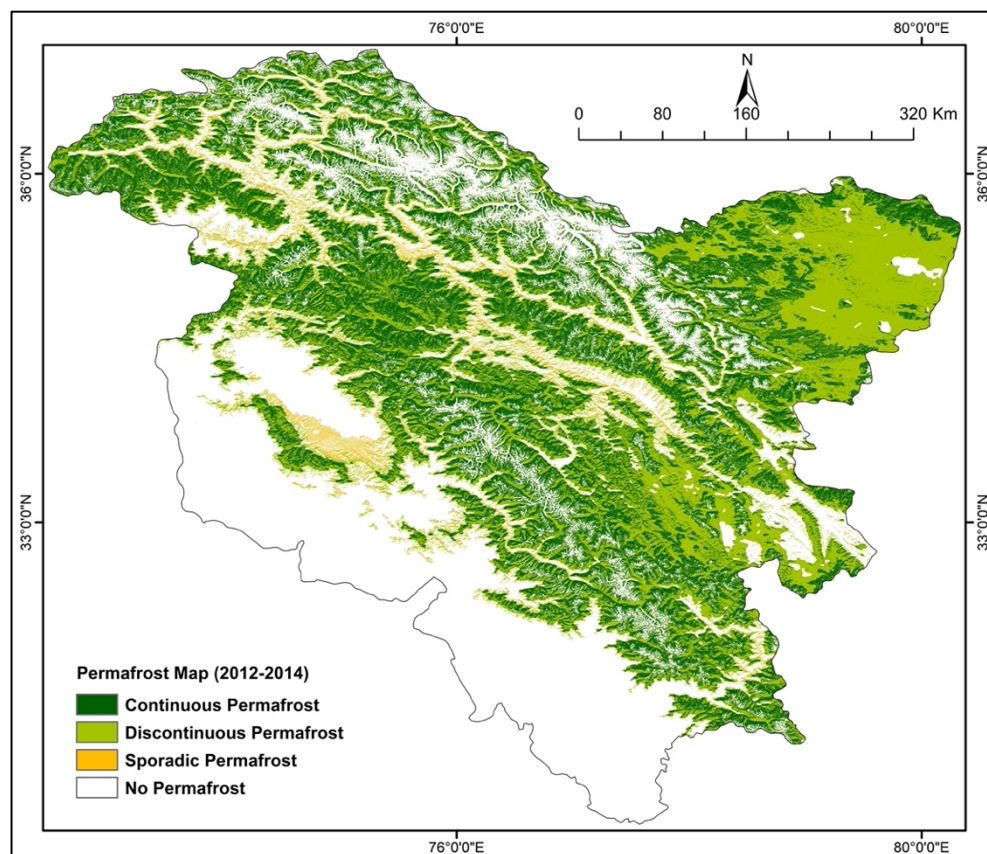

**Figure S13.** Map of the study area showing the permafrost extent for 20012-14.

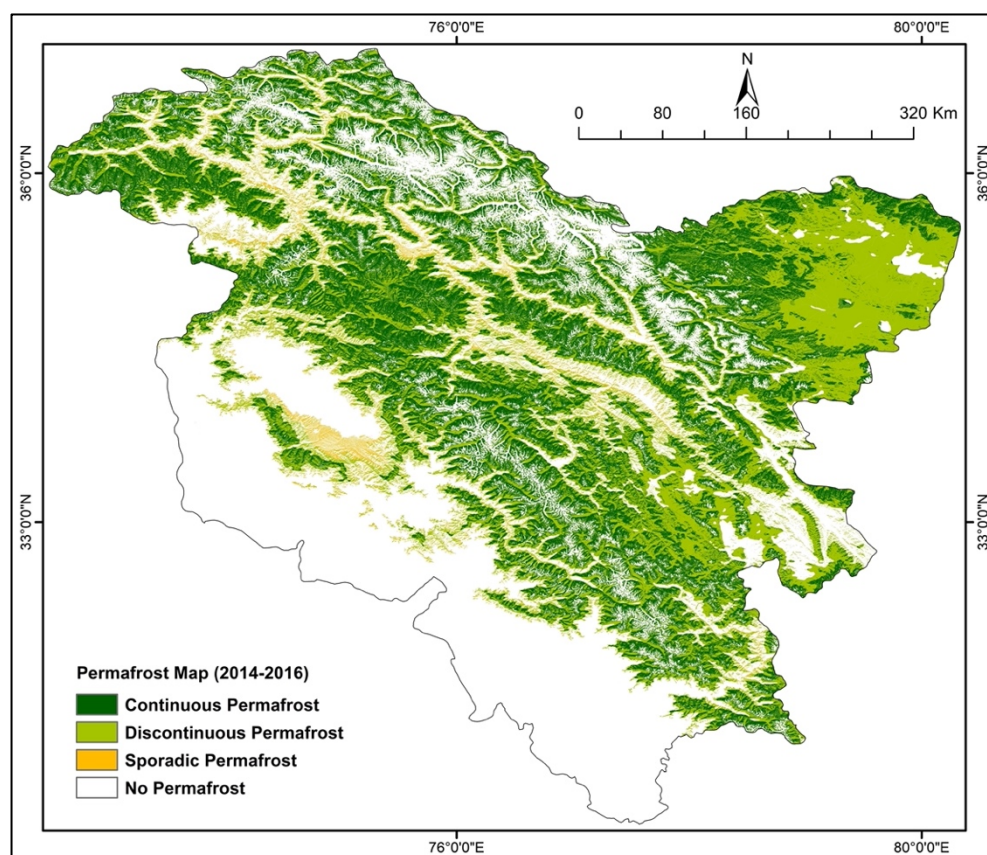

**Figure S14.** Map of the study area showing the permafrost extent for 2014-16.



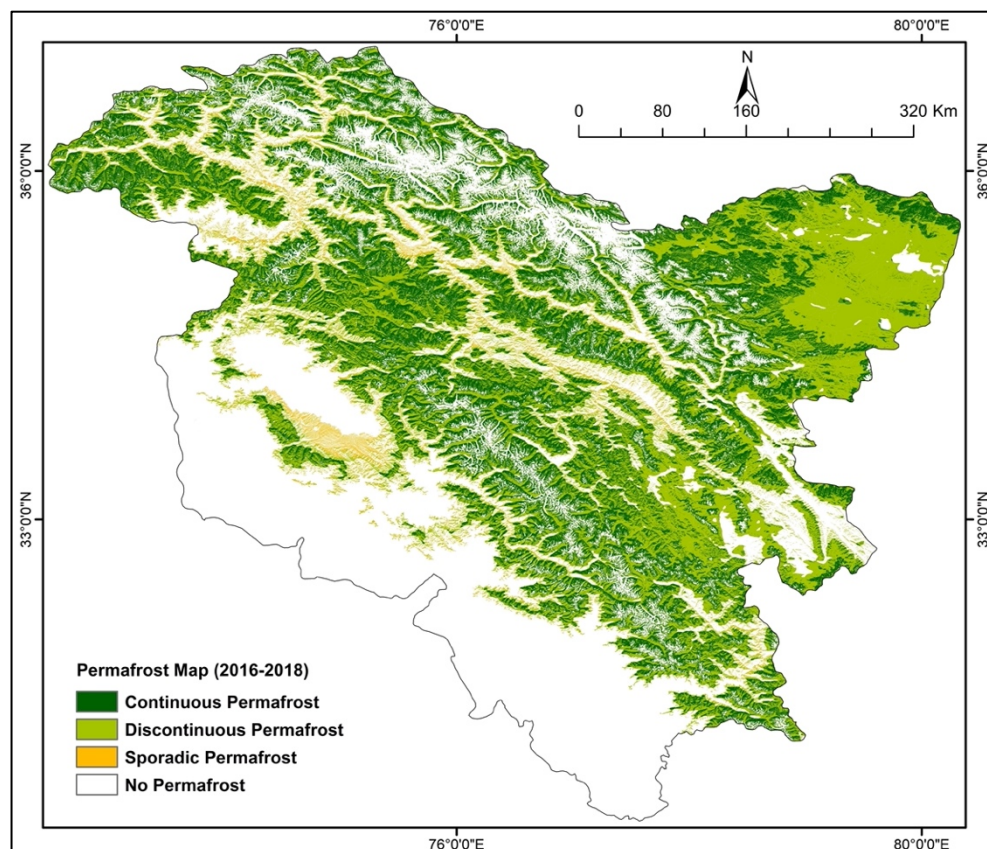

**Figure S15.** Map of the study area showing the permafrost extent for 2016-18.

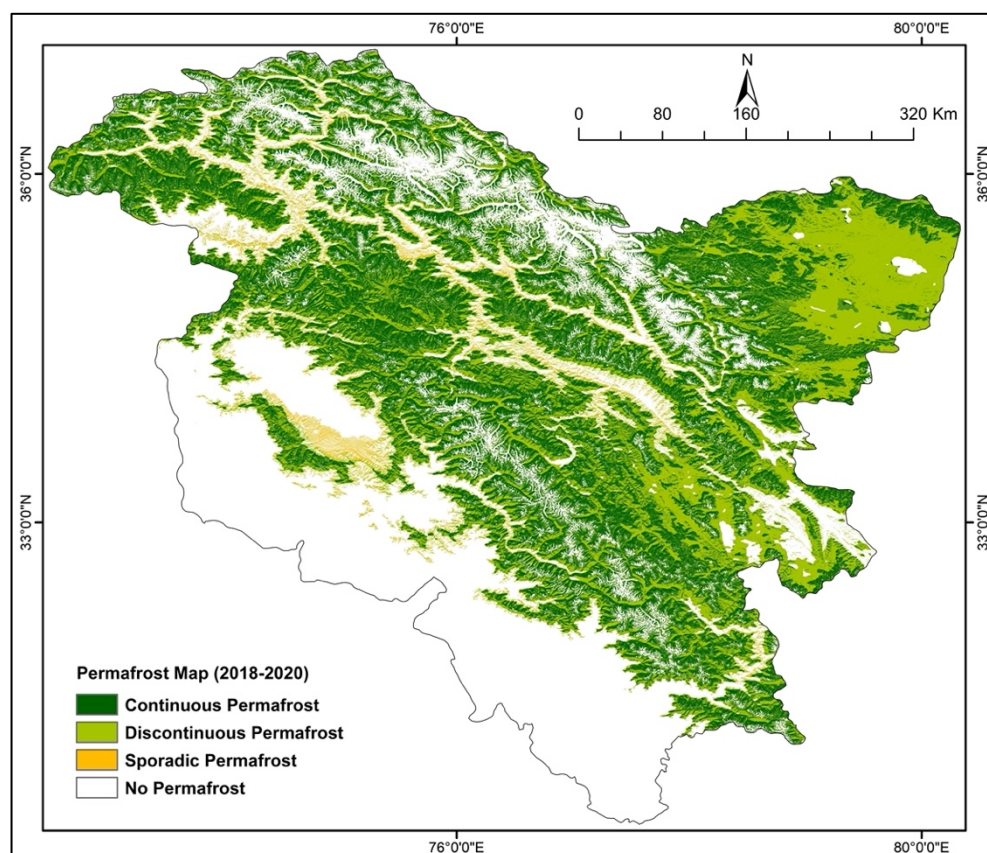

**Figure S16.** Map of the study area showing the permafrost extent for 2018-20.



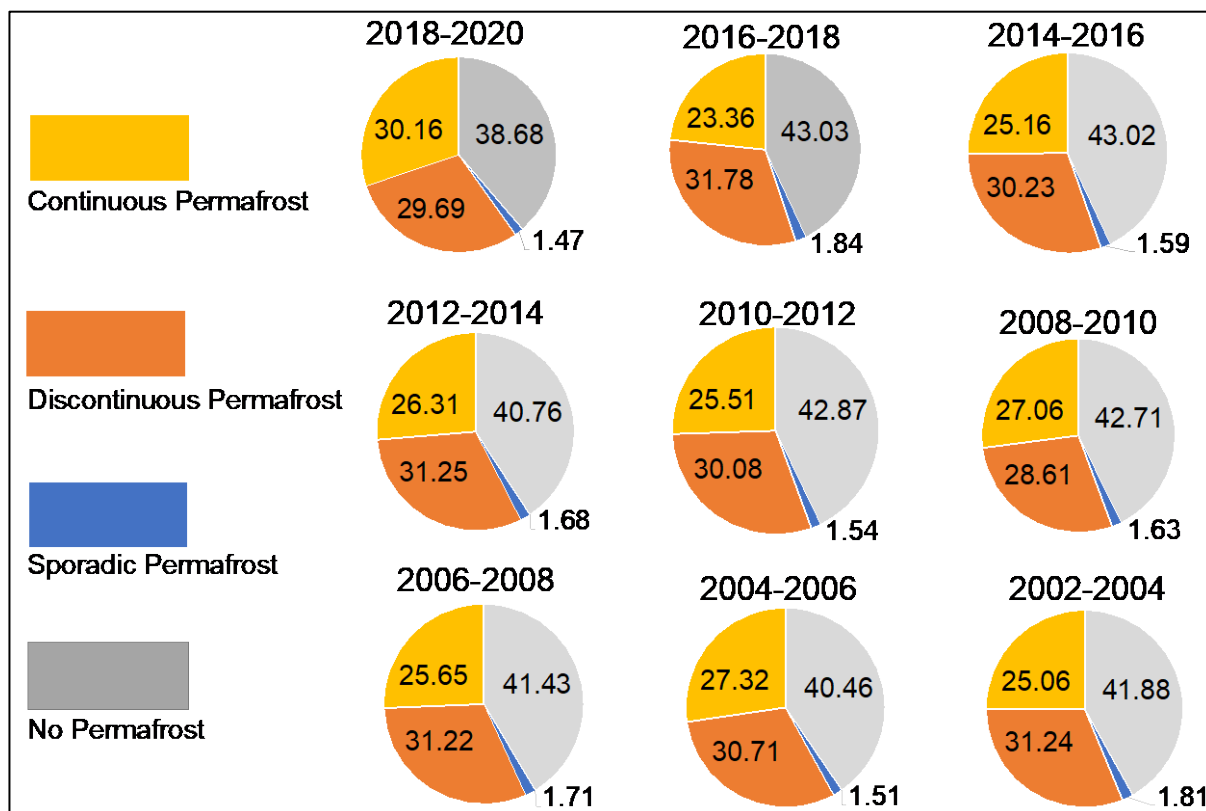

**Figure S17.** Pie charts showing the temporal (2002-04 to 2018-20) variation in the distribution of permafrost extent in the study area.
